# Supplementary material for: Effects of particle size reduction combined with β-cyclodextrin on the in vitro dissolution and in vivo relative bioavailability of ginsenosides in Panax ginseng
Source: Royal Society of Chemistry journal article supplement (doi:10.1039/d2fo01098d), 2022-01-01
Supplement: d2fo01098d1.pdf [file d2fo01098d1.pdf]

Supplementary information:

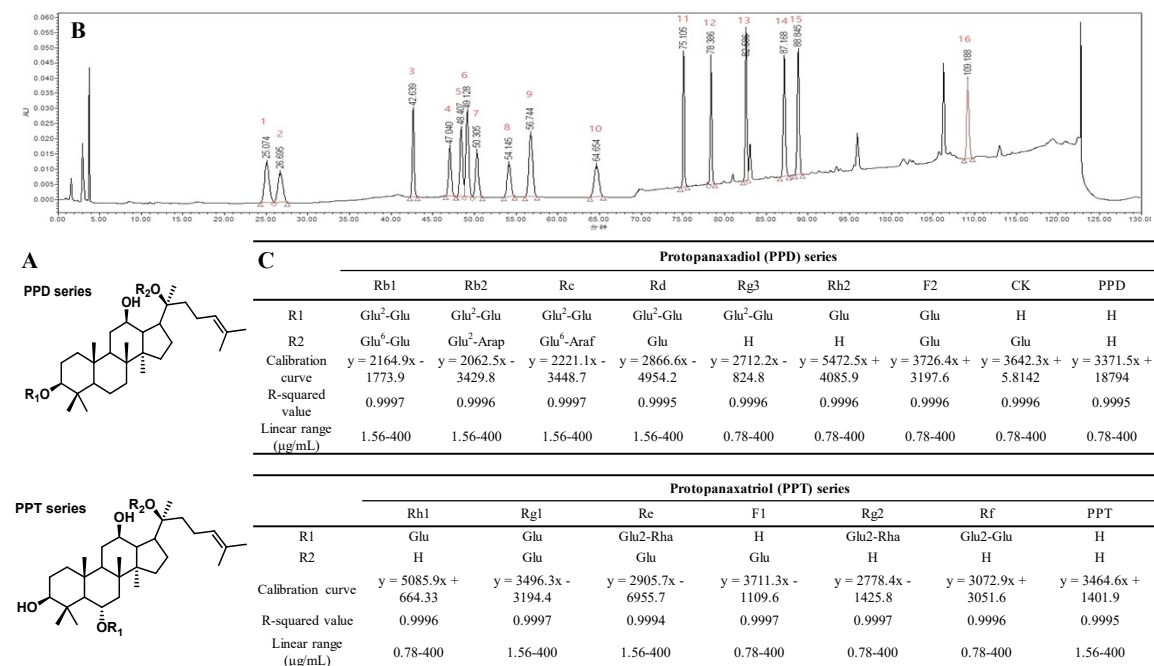

Supplementary Fig. 1. (A) The structure of PPD- and PPT-type ginsenosides, (B) chromatogram of 16 ginsenosides standards, (C) calibration curves of 16 ginsenosides.

**Supplementary Table 1.** The ion-pair list of precursor and product ions and the collision energy of the 16 ginsenosides

| Ginsenoside | Precursor ion (m/z) | Product ion 1 (m/z) | Collision energy 1 (eV) | Product ion 2 (m/z) | Collision energy 2 (eV) |
|-------------|---------------------|---------------------|-------------------------|---------------------|-------------------------|
| Rb1         | 1107.7              | 945.6               | 65                      | 783.4               | 65                      |
| Rb2         | 1077.4              | 915.4               | 58                      | 621.4               | 70                      |
| Rc          | 1077.7              | 945.4               | 62                      | 783.4               | 62                      |
| Rd          | 945.5               | 783.5               | 50                      | 621.4               | 70                      |
| Rg3         | 783.3               | 459.2               | 62                      | 375                 | 72                      |
| Rh2         | 621.3               | 375.1               | 60                      | /                   | /                       |
| F2          | 783.5               | 621.4               | 48                      | /                   | /                       |
| CK          | 621.3               | 459.3               | 28                      | 375.4               | 58                      |
| PPD         | 459.2               | 401.1               | 32                      | 358.9               | 60                      |
| Rh1         | 683.3               | 637.4               | 30                      | 475.4               | 42                      |
| Rg1         | 799.5               | 637.4               | 35                      | 179                 | 35                      |
| Re          | 945.5               | 637.4               | 56                      | 475.4               | 65                      |
| F1          | 683.3               | 637.4               | 28                      | 475.3               | 36                      |
| Rg2         | 783.3               | 475.4               | 52                      | 637.4               | 42                      |
| Rf          | 799.5               | 637.4               | 35                      | 475.4               | 35                      |
| PPT         | 475.3               | 389.3               | 44                      | 373.3               | 46                      |
